# Supplementary material for: Enantiodiscriminating Lipophilic Liquid Membrane-Based Assay for High-Throughput Nanomolar Enantioenrichment of Chiral Building Blocks
Source: MDPI journal article supplement (doi:10.3390/membranes13010094), 2023-01-11
Supplement: s1 [file s1]

## Supporting Information

# Enantiodiscriminating lipophilic liquid membrane-based assay for high-throughput nanomolar enantioenrichment of chiral building blocks

Bálint Jávör <sup>1</sup>, Panna Vezse <sup>1</sup>, Ádám Golcs <sup>1,\*</sup>, Péter Huszthy <sup>1</sup> and Tünde Tóth <sup>1,2</sup>

<sup>1</sup> Department of Organic Chemistry and Technology, Budapest University of Technology and Economics, Szent Gellért tér 4, H-1111 Budapest, Hungary

<sup>2</sup> Centre for Energy Research, Konkoly-Thege Miklós út 29-33, H-1121 Budapest, Hungary

\* Correspondence: golcs.adam@edu.bme.hu

### Contents

1. UV-Vis calibration curves ( $10^{-4}$ - $10^{-5}$  mol·L<sup>-1</sup>) for determining the concentration of the model compounds (**19-23**) at pH=1.0 in aqueous solutions
2. <sup>1</sup>H-NMR and <sup>13</sup>C-NMR spectra of the new compounds
3. Preliminary studies on kinetics of separability using UV-Vis absorption spectroscopy to determine the concentration of the aqueous phases

**Section S1. UV-Vis calibration curves ( $10^{-4}$ - $10^{-5}$  mol·L<sup>-1</sup>) for determining the concentration of the model compounds (19-23) at pH=1.0 in aqueous solutions**

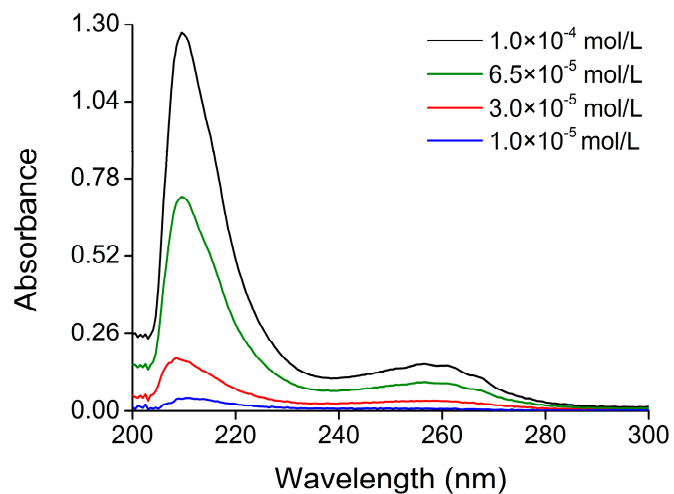

**Figure S1.** UV-absorption spectra of model compound **19**

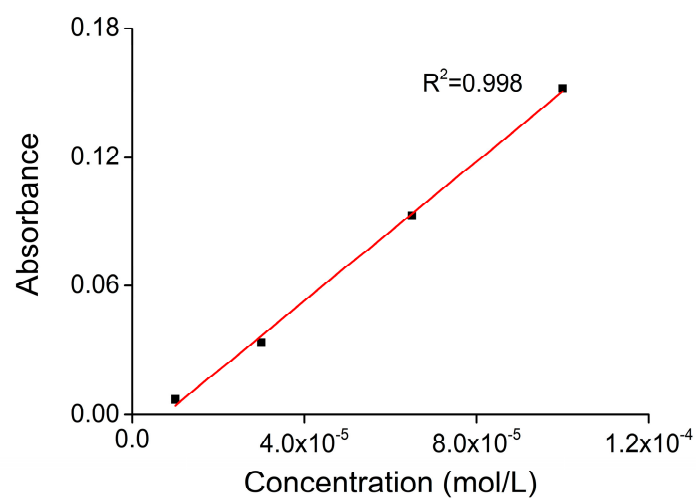

**Figure S2.** Calibration curve for model compound **19** at 258 nm

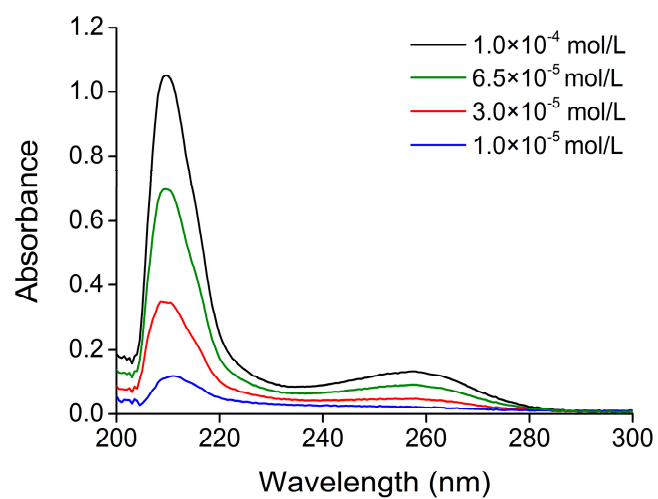

**Figure S3.** UV-absorption spectra of model compound **20**

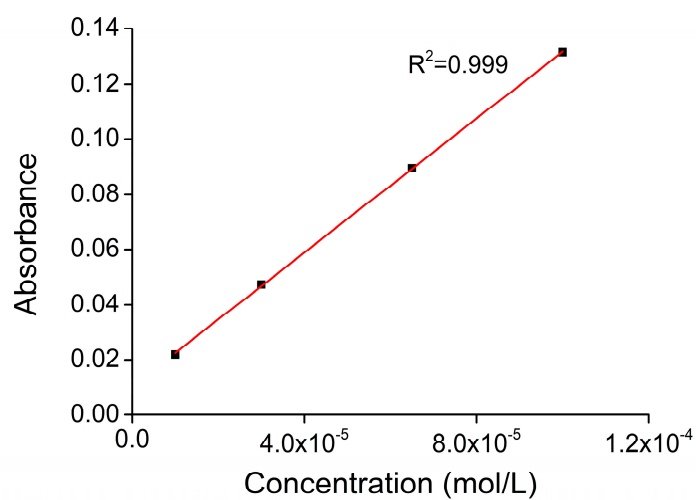

**Figure S4.** Calibration curve for model compound **20** at 258 nm

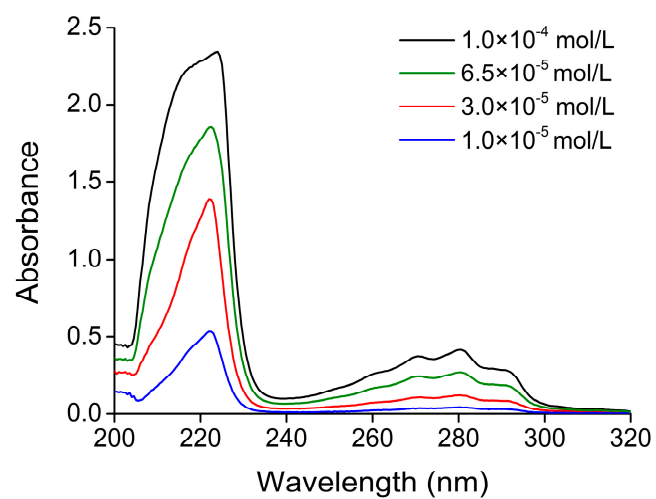

**Figure S5.** UV-absorption spectra of model compound **21**

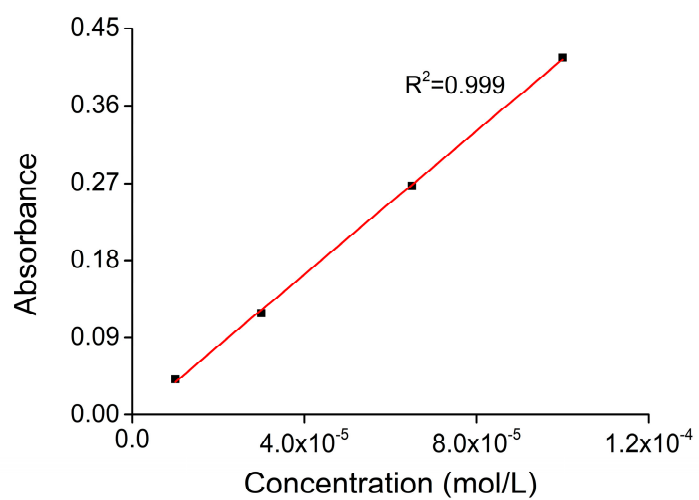

**Figure S6.** Calibration curve for model compound **21** at 280 nm

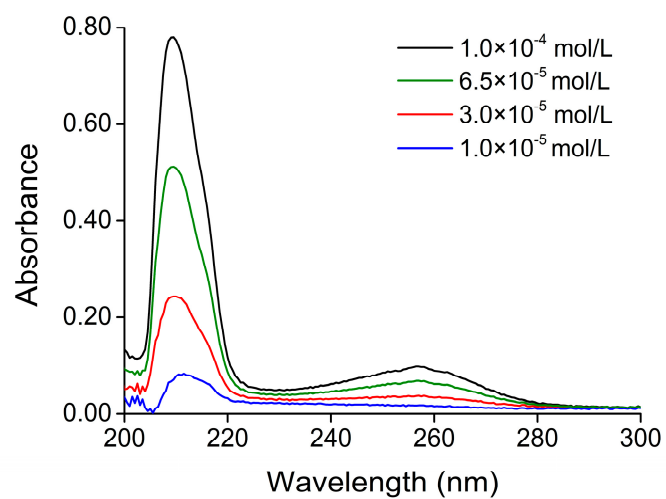

**Figure S7.** UV-absorption spectra of model compound **22**

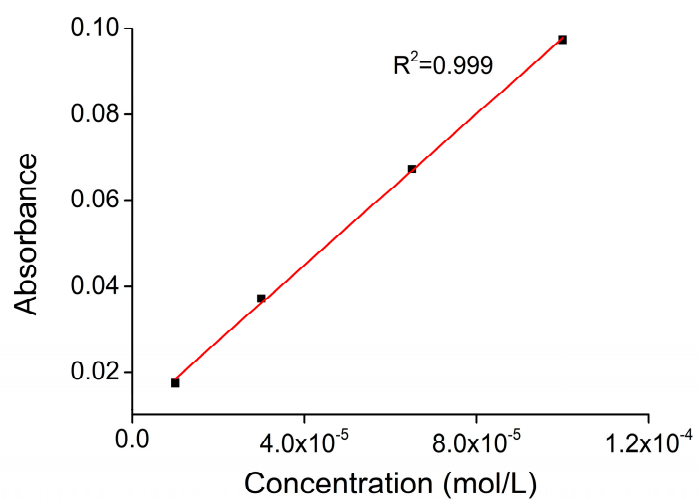

**Figure S8.** Calibration curve for model compound **22** at 258 nm

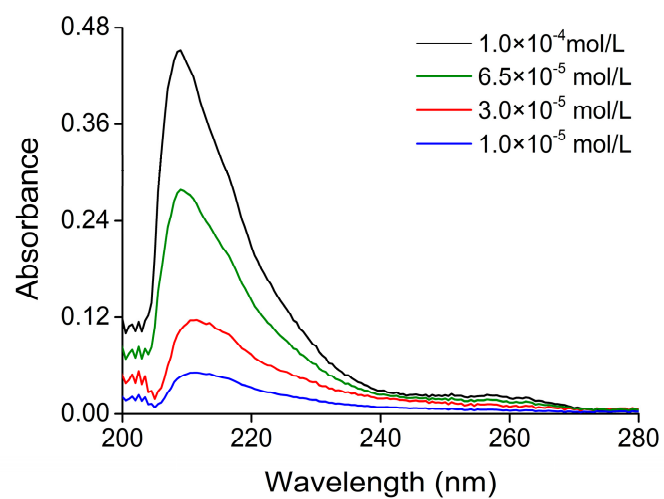

**Figure S9.** UV-absorption spectra of model compound **23**

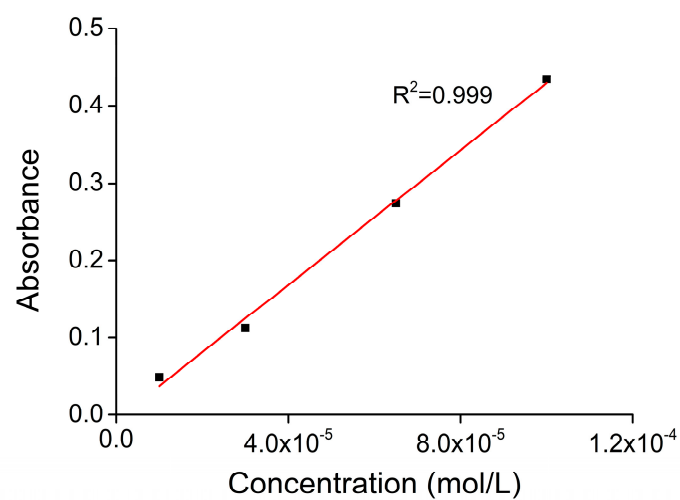

**Figure S10.** Calibration curve for model compound **23** at 210 nm

## Section S2. $^1\text{H}$ -NMR and $^{13}\text{C}$ -NMR spectra of the new compounds

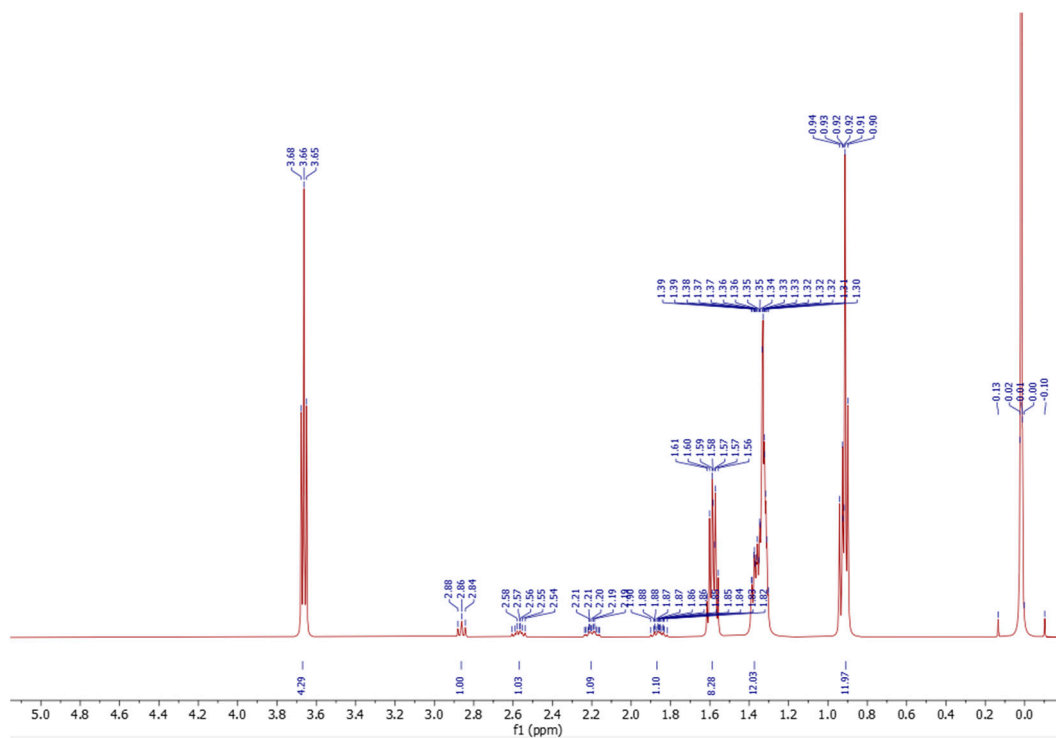

Figure S11.  $^1\text{H}$ -NMR spectrum of CA-6 (**8**, solvent:  $\text{CDCl}_3$ )

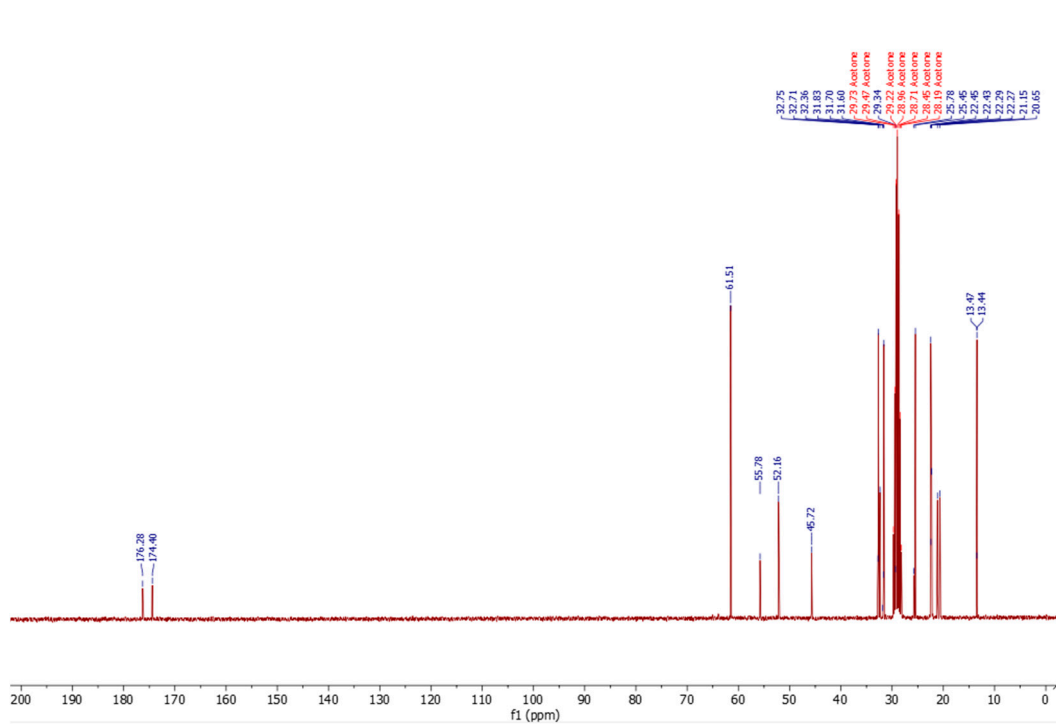

Figure S12.  $^{13}\text{C}$ -NMR spectrum of CA-6 (**8**, solvent:  $\text{acetone-}d_6$ )

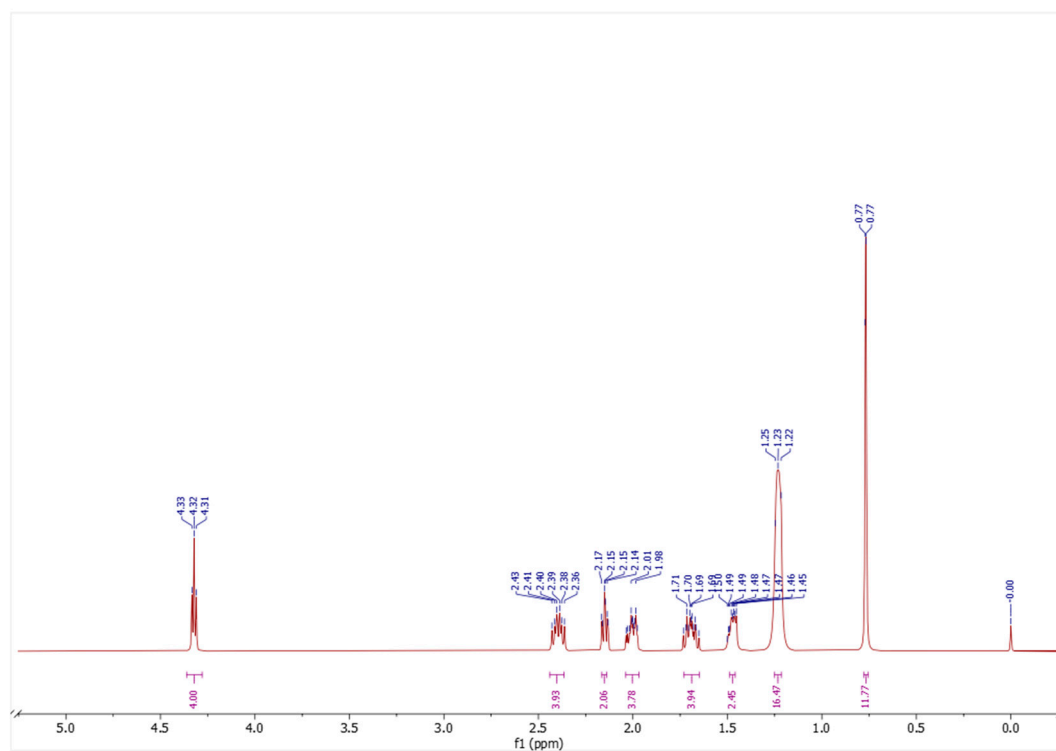

**Figure S13.** <sup>1</sup>H-NMR spectrum of CA-8 (**9**, solvent: acetone-*d*<sub>6</sub>)

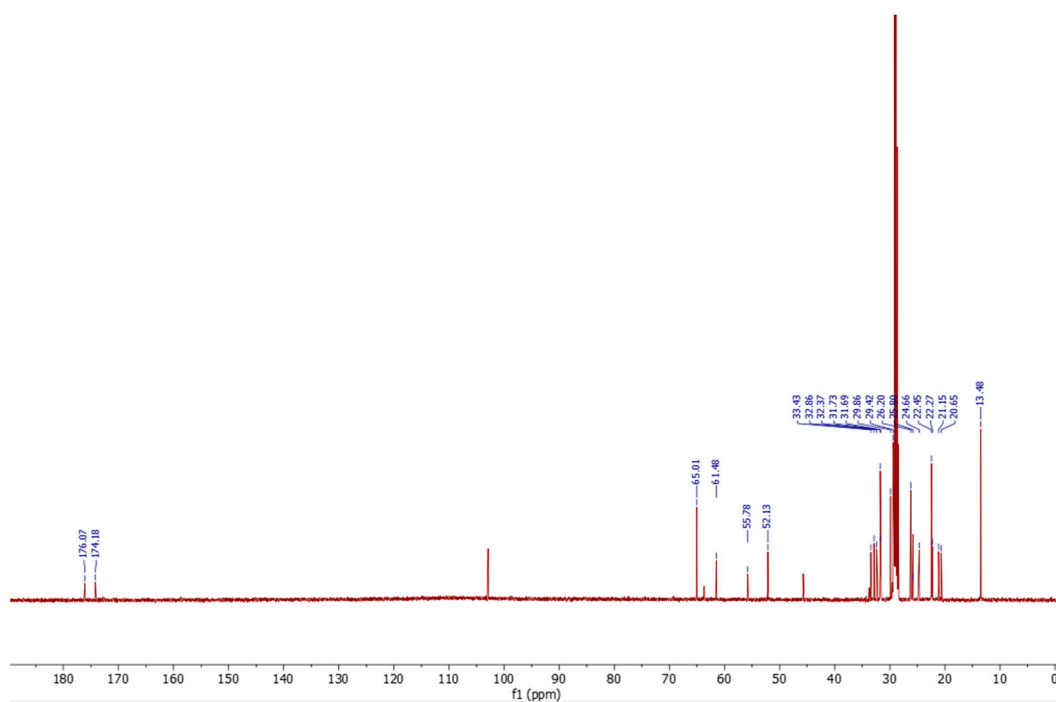

**Figure S14.** <sup>13</sup>C-NMR spectrum of CA-8 (**9**, solvent: acetone-*d*<sub>6</sub>)



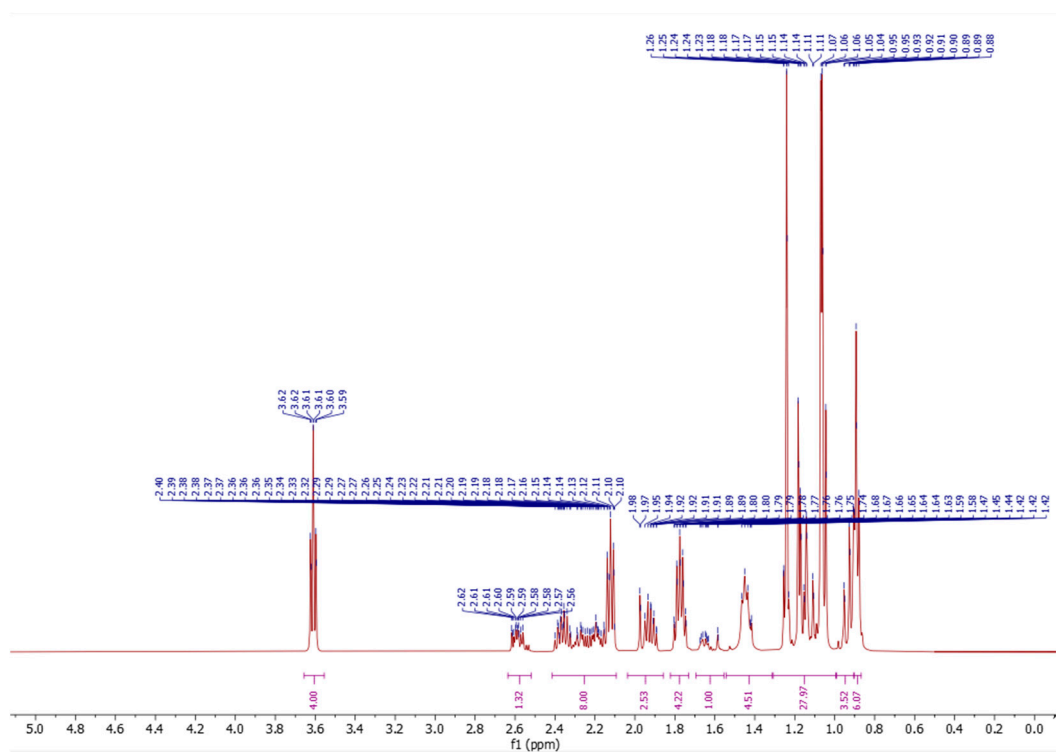

Figure S15. <sup>1</sup>H-NMR spectrum of CA-12 (**10**, solvent: CDCl<sub>3</sub>)

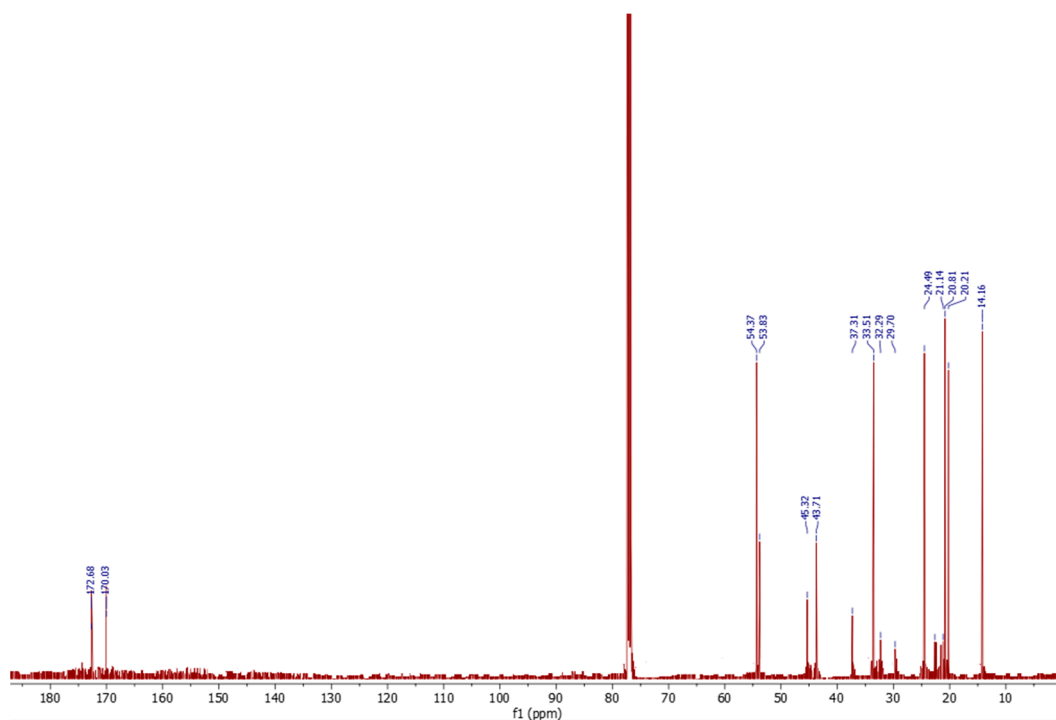

Figure S16. <sup>13</sup>C-NMR spectrum of CA-12 (**10**, solvent: CDCl<sub>3</sub>)

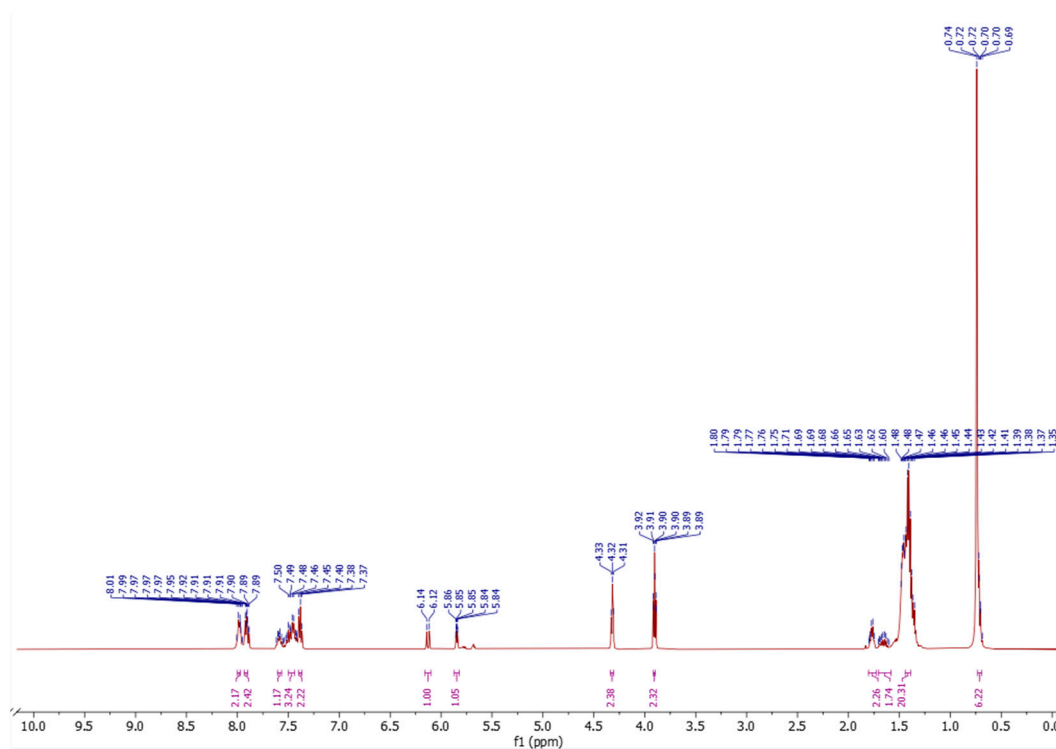

**Figure S17.** <sup>1</sup>H-NMR spectrum of DBTA-8 (**16**, solvent: acetone-*d*<sub>6</sub>)

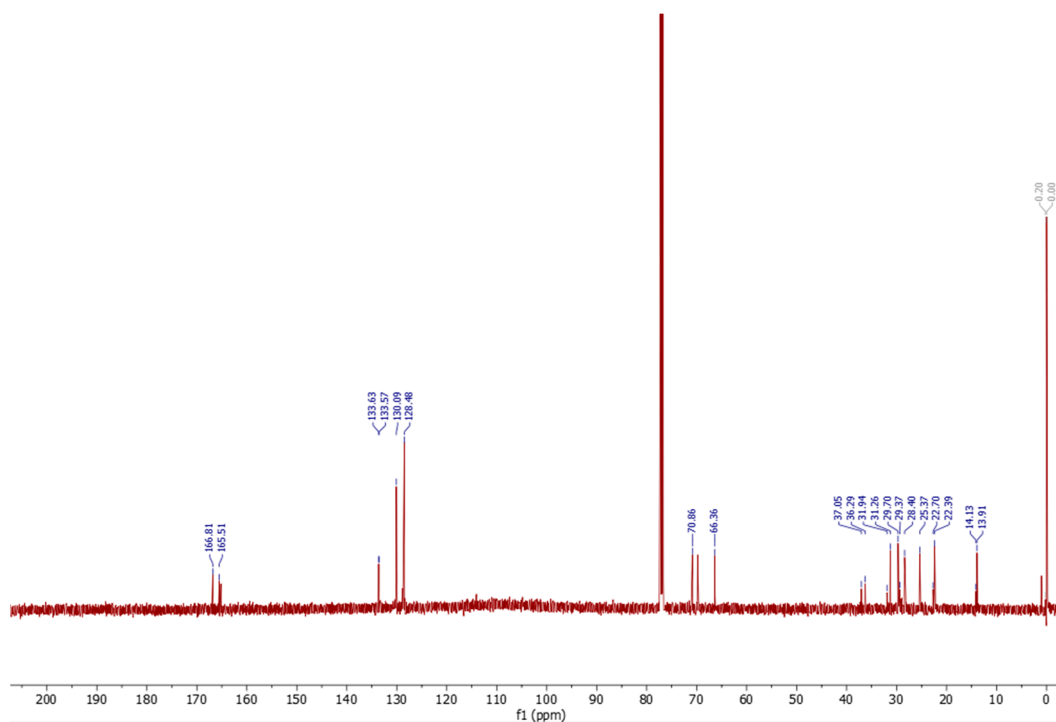

**Figure S18.** <sup>13</sup>C-NMR spectrum of DBTA-8 (**16**, solvent: CDCl<sub>3</sub>)

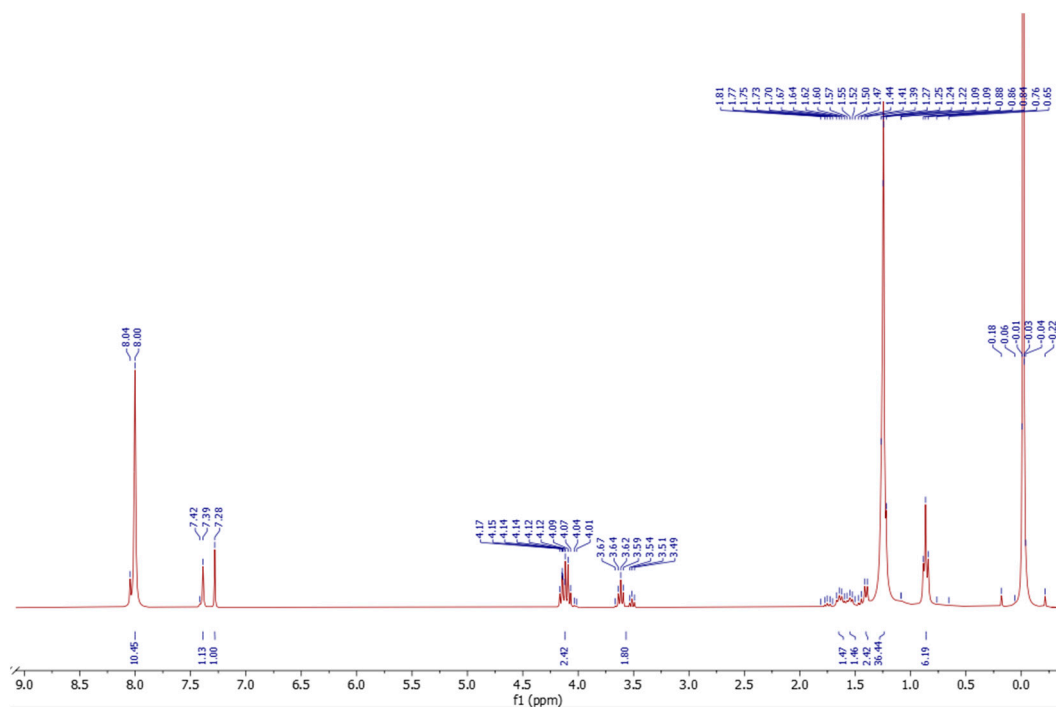

**Figure S21.**  $^1\text{H}$ -NMR spectrum of DBTA-12 (**17**, solvent:  $\text{CDCl}_3$ )

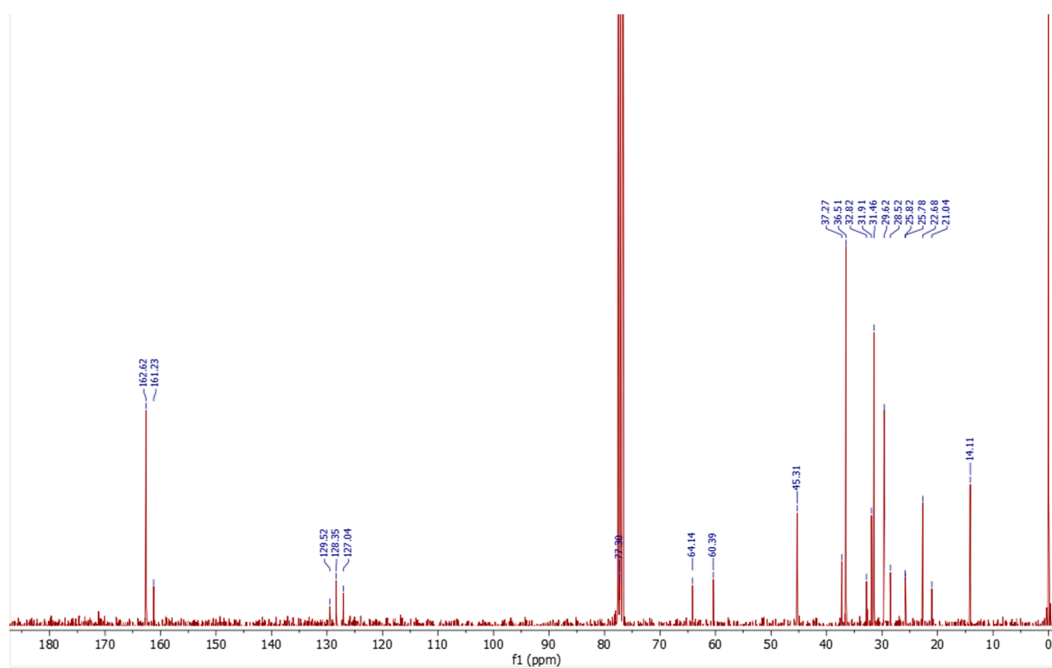

**Figure S22.**  $^{13}\text{C}$ -NMR spectrum of C DBTA-12 (**17**, solvent:  $\text{CDCl}_3$ )

**Section S3. Preliminary studies on kinetics of separability using UV-Vis absorption spectroscopy to determine the concentration of the aqueous phases**

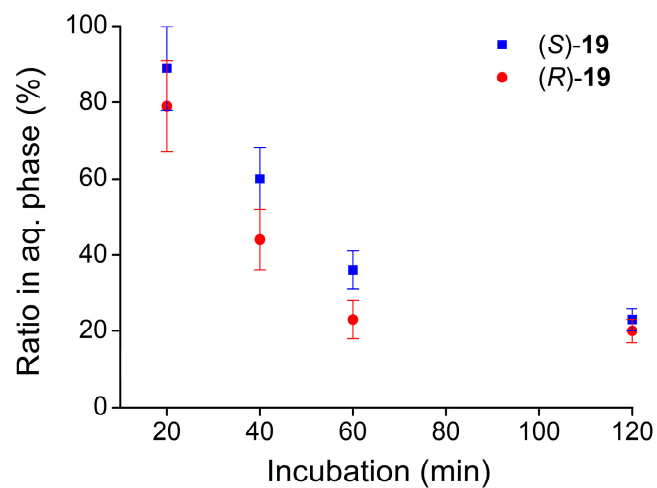

**Figure S23.** Studies on separability of model compound **19** using NAP-6 (**18**) as a single-component selector

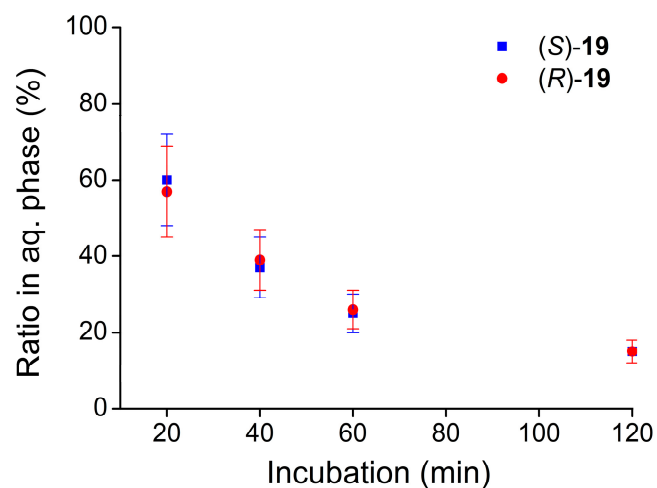

**Figure S24.** Studies on separability of model compound **19** using NAP-6 (**18**) as a selector molecule in a decane-1-ol based apolar liquid membrane

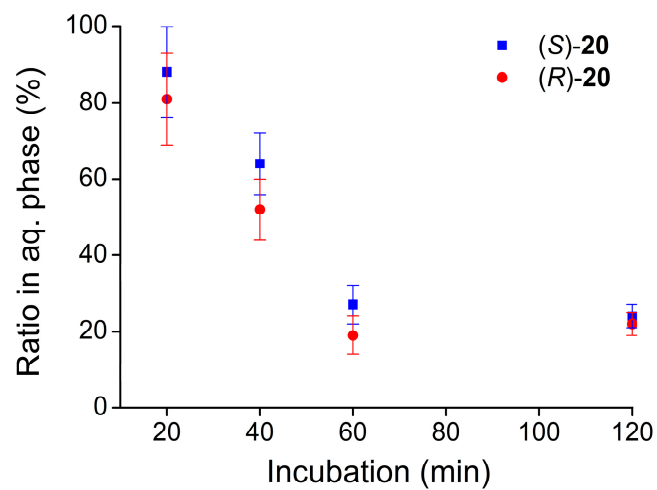

**Figure S25.** Studies on separability of model compound **20** using NAP-6 (**18**) as a single-component selector

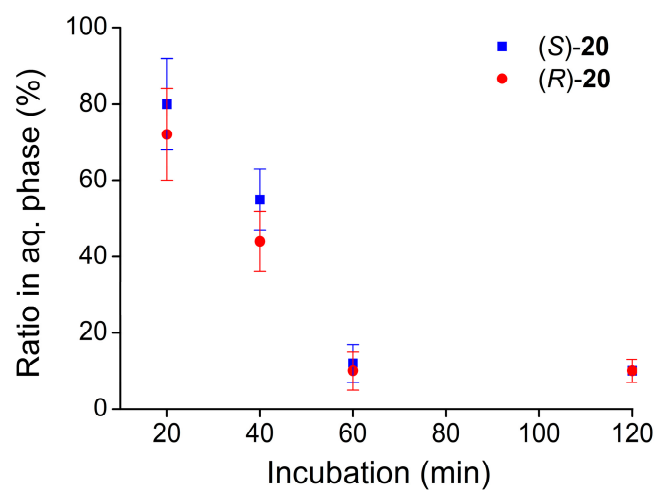

**Figure S26.** Studies on separability of model compound **20** using NAP-6 (**18**) as a selector molecule in a decane-1-ol based apolar liquid membrane

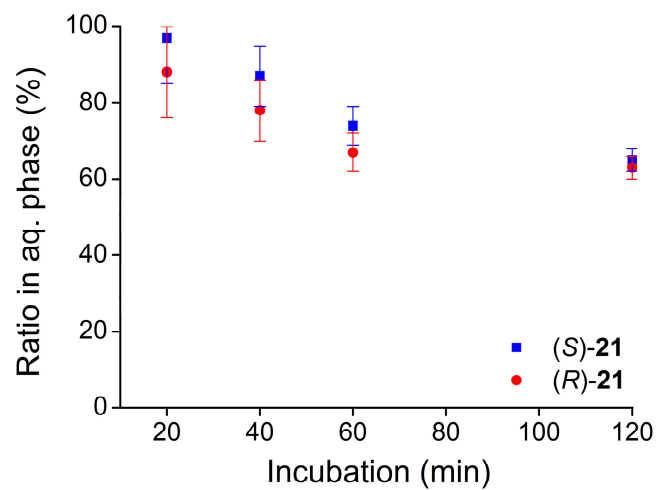

**Figure S27.** Studies on separability of model compound **21** using NAP-6 (**18**) as a single-component selector

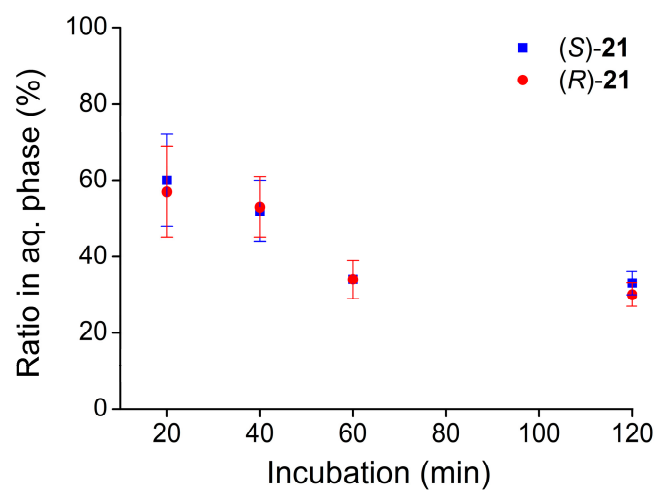

**Figure S28.** Studies on separability of model compound **21** using NAP-6 (**18**) as a selector molecule in a decane-1-ol based apolar liquid membrane

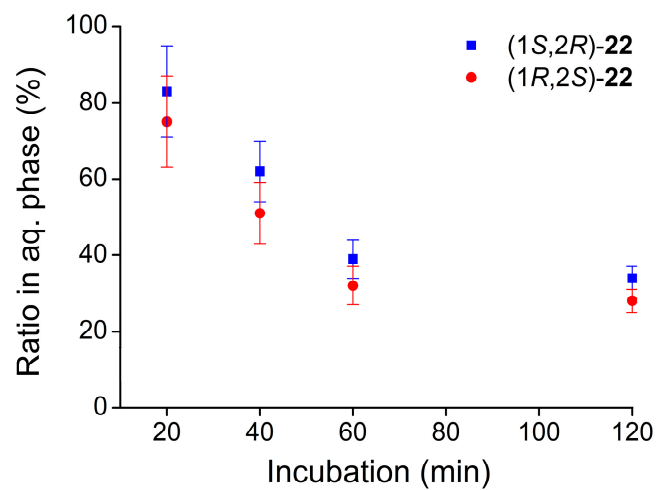

**Figure S29.** Studies on separability of model compound **22** using NAP-6 (**18**) as a single-component selector

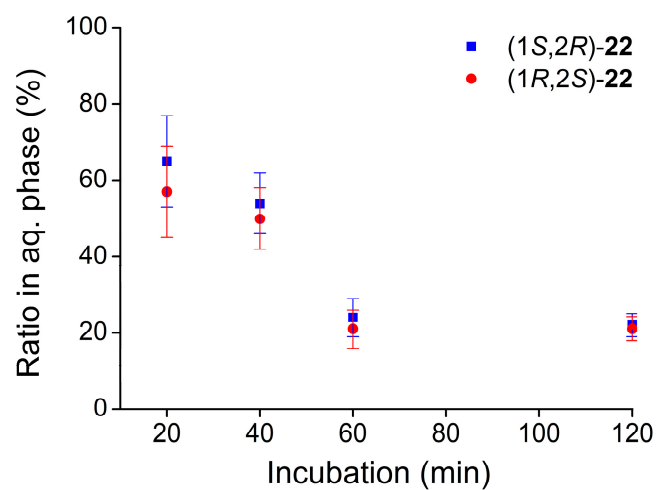

**Figure S30.** Studies on separability of model compound **22** using NAP-6 (**18**) as a selector molecule in a decane-1-ol based apolar liquid membrane

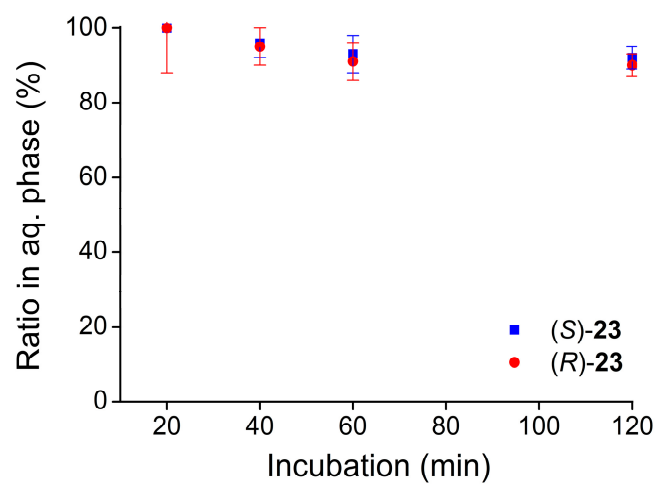

**Figure S31.** Studies on separability of model compound **23** using NAP-6 (**18**) as a single-component selector

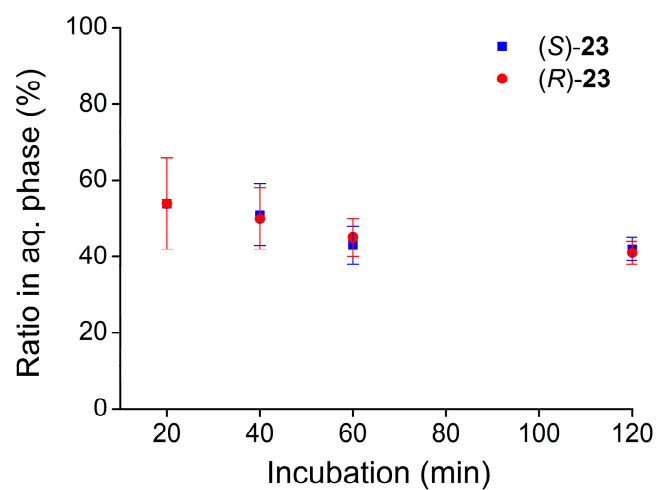

**Figure S32.** Studies on separability of model compound **23** using NAP-6 (**18**) as a selector molecule in a decane-1-ol based apolar liquid membrane



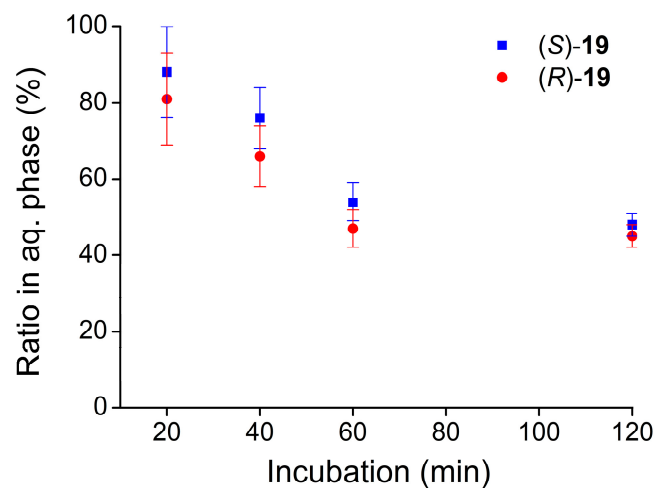

**Figure S33.** Studies on separability of model compound **19** using CA-12 (**10**) as a selector molecule in a decane-1-ol based apolar liquid membrane

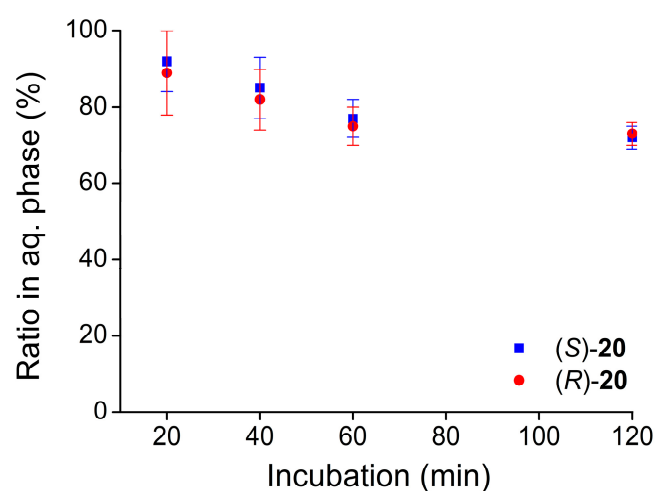

**Figure S34.** Studies on separability of model compound **20** using CA-12 (**10**) as a selector molecule in a decane-1-ol based apolar liquid membrane

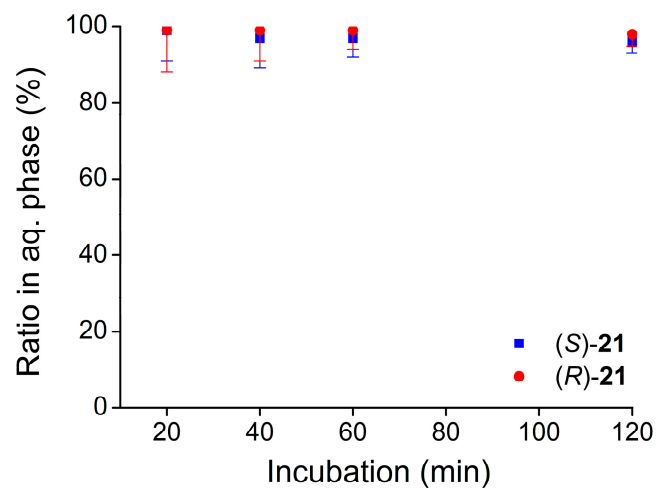

**Figure S35.** Studies on separability of model compound **21** using CA-12 (**10**) as a selector molecule in a decane-1-ol based apolar liquid membrane

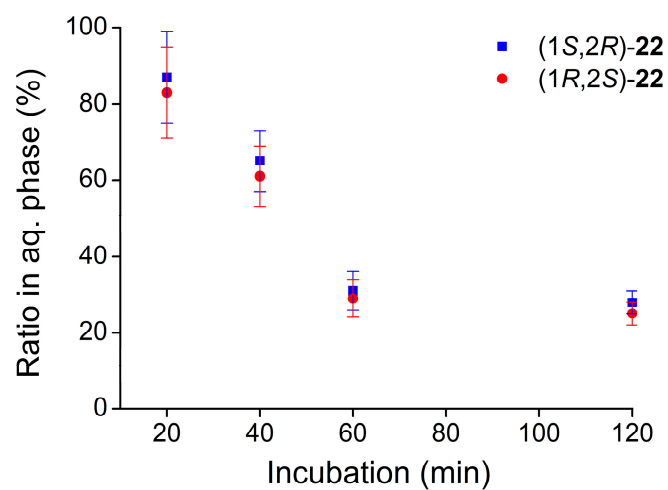

**Figure S36.** Studies on separability of model compound **22** using CA-12 (**10**) as a selector molecule in a decane-1-ol based apolar liquid membrane

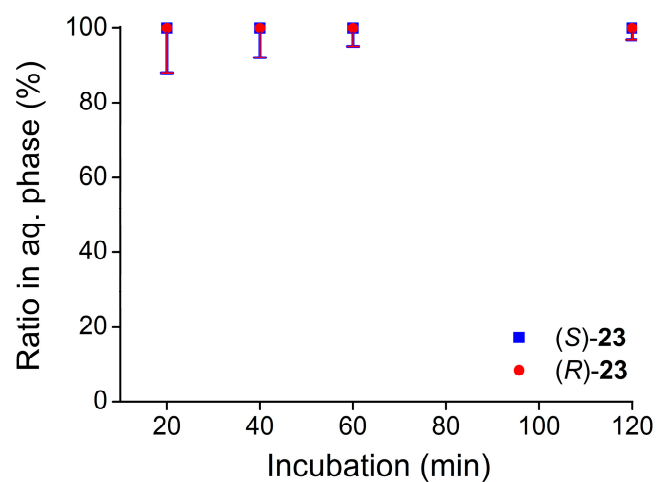

**Figure S37.** Studies on separability of model compound **23** using CA-12 (**10**) as a selector molecule in a decane-1-ol based apolar liquid membrane

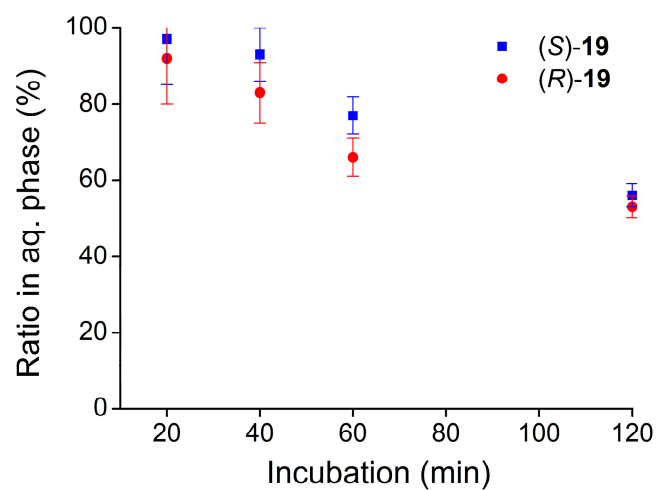

**Figure S38.** Studies on separability of model compound **19** using MEN-10 (**14**) as a single-component selector

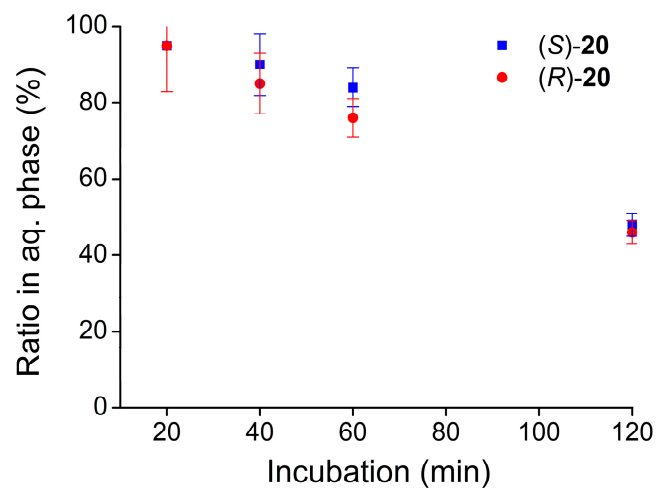

**Figure S39.** Studies on separability of model compound **20** using MEN-10 (**14**) as a single-component selector

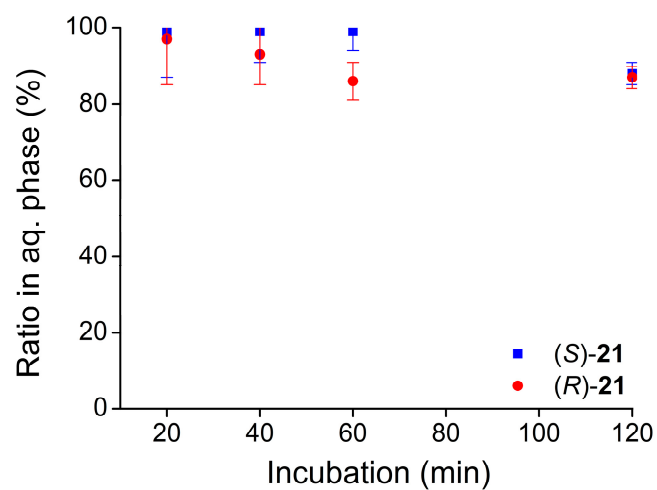

**Figure S40.** Studies on separability of model compound **21** using MEN-10 (**14**) as a single-component selector

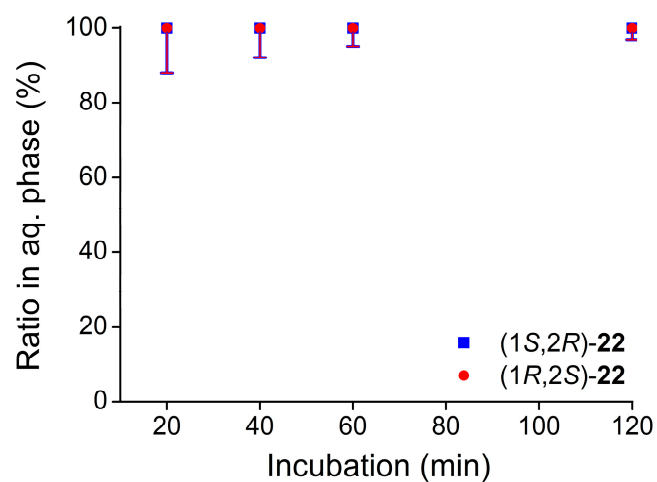

**Figure S41.** Studies on separability of model compound **22** using MEN-10 (**14**) as a single-component selector

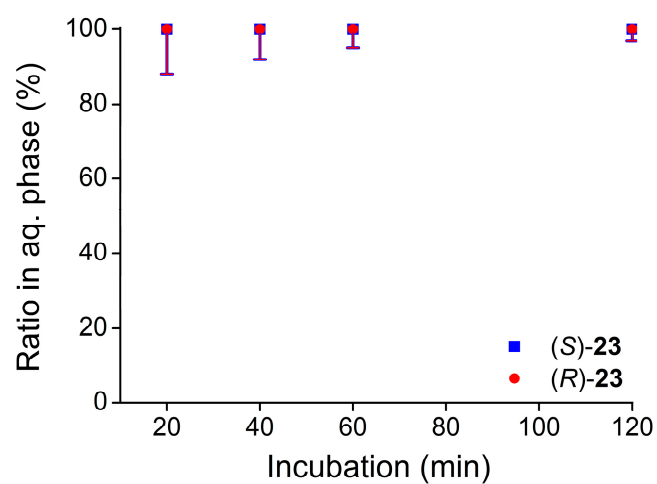

**Figure S42.** Studies on separability of model compound **23** using MEN-10 (**14**) as a single-component selector

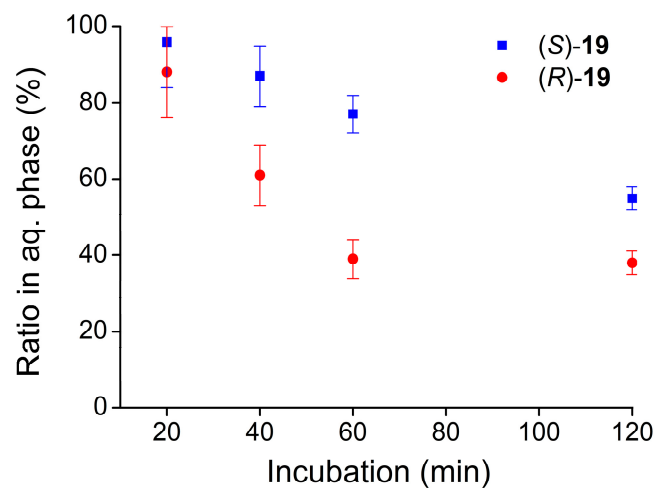

**Figure S43.** Studies on separability of model compound **19** using DBTA-12 (**17**) as a single-component selector

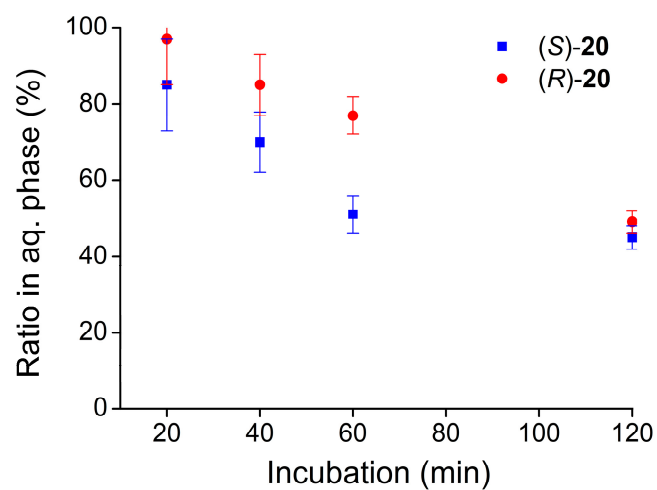

**Figure S44.** Studies on separability of model compound **20** using DBTA-12 (**17**) as a single-component selector

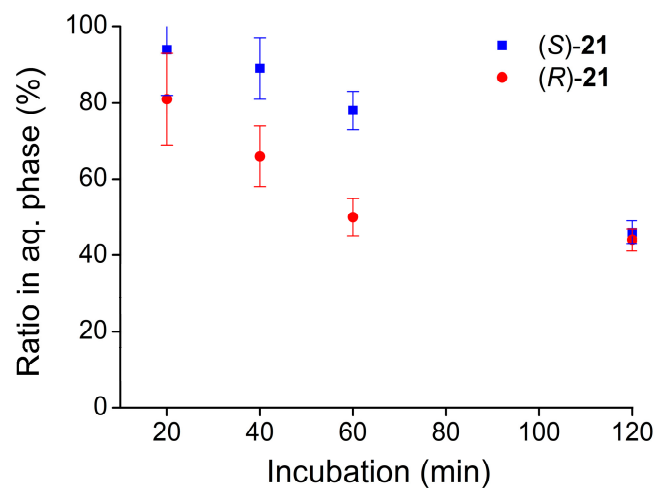

**Figure S45.** Studies on separability of model compound **21** using DBTA-12 (**17**) as a single-component selector

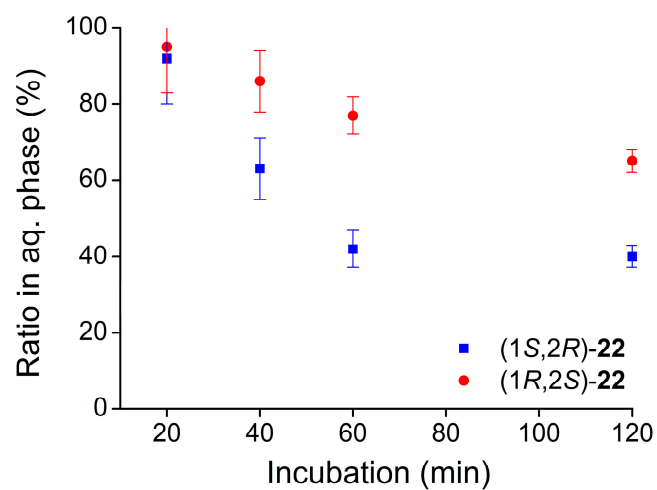

**Figure S46.** Studies on separability of model compound **22** using DBTA-12 (**17**) as a single-component selector

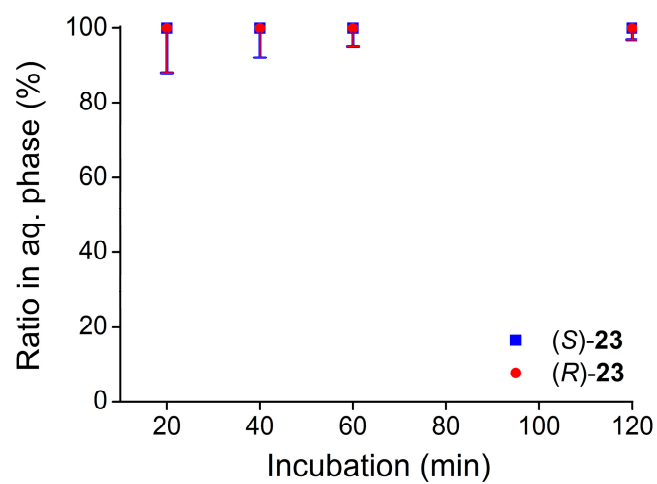

**Figure S47.** Studies on separability of model compound **23** using DBTA-12 (**17**) as a single-component selector
